# Supplementary material
Source: Royal Society of Chemistry journal article supplement (https://www.rsc.org/suppdata/dt/1999/2683/903517f.doc)
Supplement: Supplementary file 1 [file 903517f.doc]

Magnetic susceptibility measurement for dimer **1**

| **T/K** | **** | **** | **** | **T** | **T** |
| --- | --- | --- | --- | --- | --- |
| 4.5 | 0.04124 | 0.04808 | 0.03535 | 0.2164 | 0.146 |
| 8.01 | 0.024 | 0.03084 | 0.02852 | 0.2471 | 0.217 |
| 10.99 | 0.01719 | 0.02403 | 0.02408 | 0.2641 | 0.256 |
| 13.99 | 0.01312 | 0.01996 | 0.02072 | 0.2792 | 0.283 |
| 17 | 0.01054 | 0.01738 | 0.01814 | 0.2955 | 0.303 |
| 21.01 | 0.00841 | 0.01524 | 0.01525 | 0.3202 | 0.321 |
| 30.01 | 0.00398 | 0.01084 | 0.01173 | 0.3253 | 0.351 |
| 35 | 0.00277 | 0.00961 | 0.01032 | 0.3364 | 0.361 |
| 39.98 | 0.00192 | 0.00874 | 0.00922 | 0.3494 | 0.368 |
| 44.98 | 0.00122 | 0.00806 | 0.00833 | 0.3625 | 0.373 |
| 49.94 | 6.8E-4 | 0.00754 | 0.0076 | 0.3766 | 0.380 |
| 75.05 | -0.00276 | 0.00408 | 0.00386 | 0.3062 | 0.290 |
| 100.07 | -0.00346 | 0.00338 | 0.00344 | 0.3382 | 0.344 |
| 125.07 | -0.00388 | 0.00296 | 0.00295 | 0.3702 | 0.369 |
| 150.1 | -0.00418 | 0.00266 | 0.00274 | 0.3993 | 0.411 |
| 175.13 | -0.00441 | 0.00244 | 0.00249 | 0.4273 | 0.436 |
| 200.15 | -0.00457 | 0.00227 | 0.00229 | 0.4534 | 0.458 |
| 225.16 | -0.00469 | 0.00215 | 0.00212 | 0.4841 | 0.477 |
| 250.16 | -0.00481 | 0.00203 | 0.00198 | 0.5078 | 0.495 |
| 275.13 | -0.00495 | 0.00189 | 0.00186 | 0.52 | 0.512 |
| 300.09 | -0.00509 | 0.00175 | 0.00176 | 0.5252 | 0.528 |
|  | | | | | |

--- Susceptibility measured

--- Susceptibility corrected by impurity

-- Susceptibility simulated

The best fit parameters are: J=-33cm-1, g=2.110, p=0.008, =-3.5 K

The discrepancy factor =[(obs-calc)2/obs]1/2=1.5710-3.

Magnetic susceptibility measurement for dimer **2**

| **T/K** | **obs** | **calc** | **obsT** | **calcT** |
| --- | --- | --- | --- | --- |
| **4.49** | **0.02126** | **0.02133** | **0.095** | **0.0958** |
| **6.01** | **0.02713** | **0.02698** | **0.163** | **0.162** |
| **7** | **0.02826** | **0.02839** | **0.198** | **0.189** |
| **7.98** | **0.02856** | **0.02873** | **0.228** | **0.229** |
| **11.03** | **0.0268** | **0.02691** | **0.296** | **0.297** |
| **14.01** | **0.0241** | **0.02415** | **0.338** | **0.338** |
| **17.01** | **0.02165** | **0.02163** | **0.368** | **0.368** |
| **21.01** | **0.01897** | **0.0189** | **0.399** | **0.397** |
| **25.01** | **0.01688** | **0.01678** | **0.422** | **0.420** |
| **30.01** | **0.0149** | **0.01476** | **0.447** | **0..443** |
| **35** | **0.01338** | **0.01323** | **0.468** | **0.463** |
| **39.98** | **0.01221** | **0.01203** | **0.488** | **0.481** |
| **44.98** | **0.01123** | **0.01107** | **0.505** | **0.498** |
| **49.94** | **0.01044** | **0.01029** | **0.521** | **0.514** |
| **54.92** | **0.00978** | **0.00963** | **0.537** | **0.529** |
| **59.92** | **0.00921** | **0.00908** | **0.552** | **0.544** |
| **75.04** | **0.00796** | **0.00782** | **0.597** | **0.587** |
| **100.06** | **0.00663** | **0.00654** | **0..663** | **0.654** |
| **125.06** | **0.00583** | **0.00576** | **0.729** | **0.720** |
| **150.11** | **0.00526** | **0.00523** | **0.790** | **0.785** |
| **175.14** | **0.00485** | **0.00485** | **0.849** | **0.849** |
| **200.15** | **0.00454** | **0.00462** | **0.909** | **0.924** |
| **225.14** | **0.00428** | **0.00434** | **0.964** | **0.977** |
| **250.15** | **0.00405** | **0.00416** | **1.013** | **1.041** |
| **275.12** | **0.00385** | **0.00402** | **1.059** | **1.106** |
| **300.09** | **0.00368** | **0.00389** | **1.104** | **1.167** |

The best fit parameter are: J=-4.5cm-1, g=2.107, p=0.015, N=24010-5

The discrepancy factor =[(obs-calc)2/obs]1/2=1.31810-3.
